# Supplementary material for: Constructing a well-wettable interface on a three-dimensional copper foam host with reinforced copper nanowires to stabilize zinc metal anodes
Source: Royal Society of Chemistry journal article supplement (doi:10.1039/d3ta01421e), 2023-01-01
Supplement: d3ta01421e1.pdf [file d3ta01421e1.pdf]

## Electronic Supplementary Information

### **Constructing a well-wettable interface on a three-dimensional copper foam host with reinforced copper nanowires to stabilize zinc metal anodes**

Yixing Fang,<sup>a</sup> Kun Han,<sup>ab</sup> Zhen Wang,<sup>a</sup> Jie Shi,<sup>a</sup> Ping Li<sup>a\*</sup> and Xuanhui Qu<sup>a\*</sup>

<sup>a</sup> *Beijing Advanced Innovation Center for Materials Genome Engineering, Institute for Advanced Materials and Technology, University of Science and Technology Beijing, Beijing 100083, PR China*

<sup>b</sup> *Northwest Institute for Non-ferrous Metal Research, Xi'an 710016, People's Republic of China*

\* Corresponding author.

**Email:** [ustbliping@126.com](mailto:ustbliping@126.com) (P. Li); [quxh@ustb.edu.cn](mailto:quxh@ustb.edu.cn) (X. Qu)

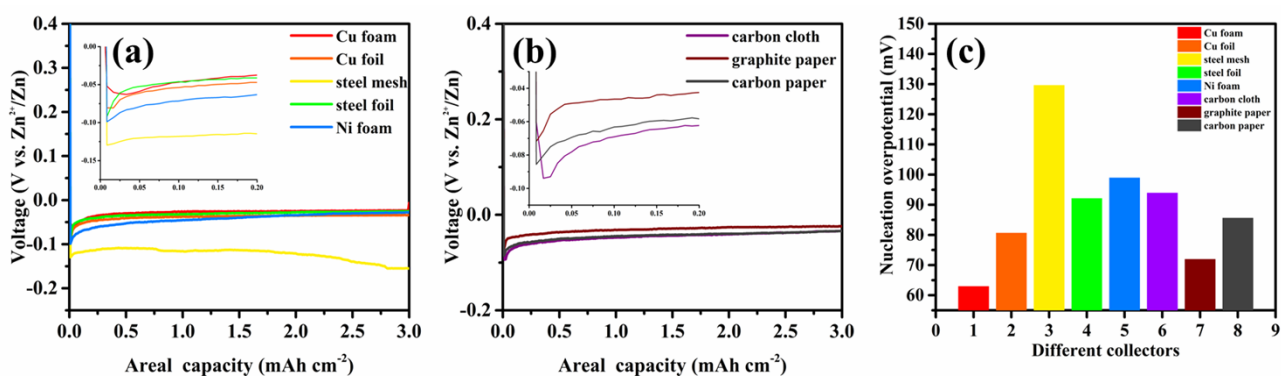

**Fig. S1** Galvanostatic plating curves of (a) Cu foam, Cu foil, steel mesh, steel foil and Ni foam; (b) carbon cloth, graphite paper and carbon paper at the current of 3 mA cm<sup>-2</sup> with at constant areal capacity of 3 mA h cm<sup>-2</sup>. (c) Zn nucleation overpotentials of different collectors.

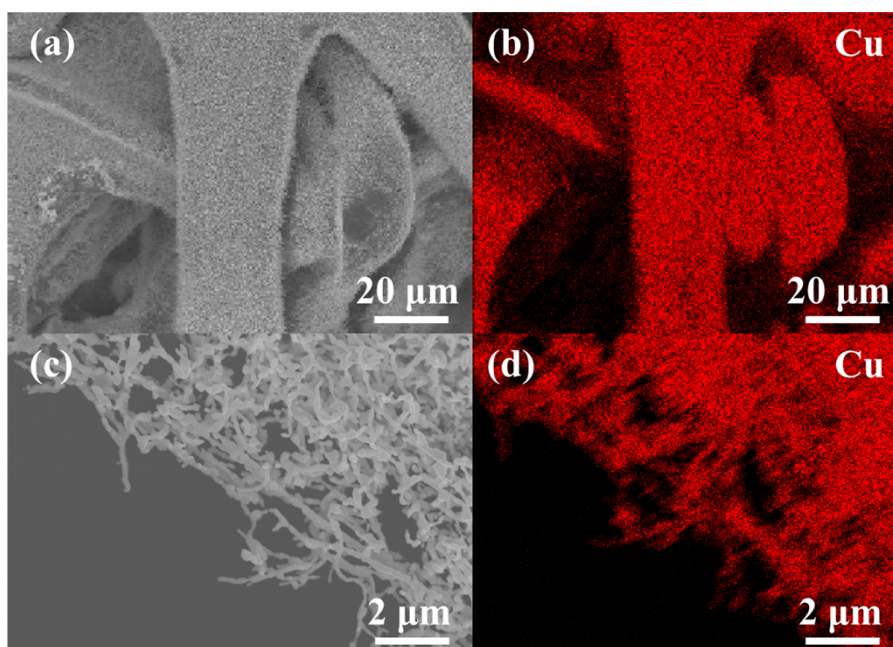

**Fig. S2** the SEM-EDS images of the top view of Cu NW@Cu foam.

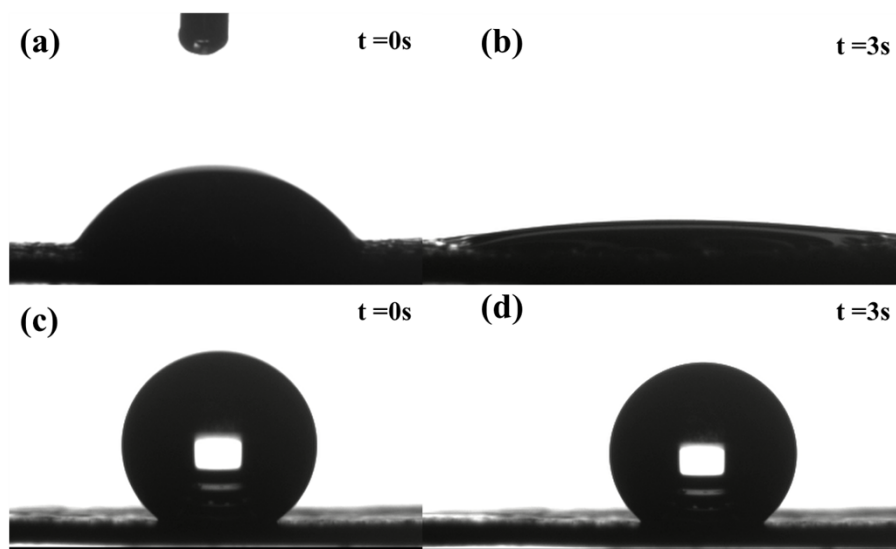

**Fig. S3** Images of contact angles of the 2 M ZnSO<sub>4</sub> electrolyte droplets on (a, b) Cu NW@Cu foam and (c, d) bare Cu foam at different time intervals.

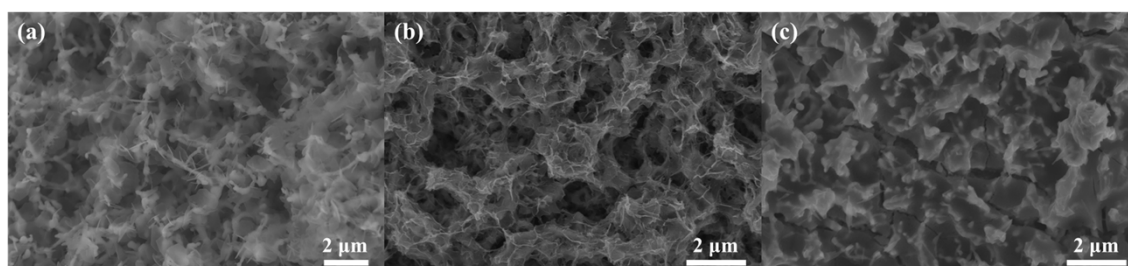

**Fig. S4** SEM images of the side wall of Cu NW@Cu foam with the areal capacity of (a) 1, (b) 2 and (c) 4 mAh cm<sup>-2</sup> after deposition.

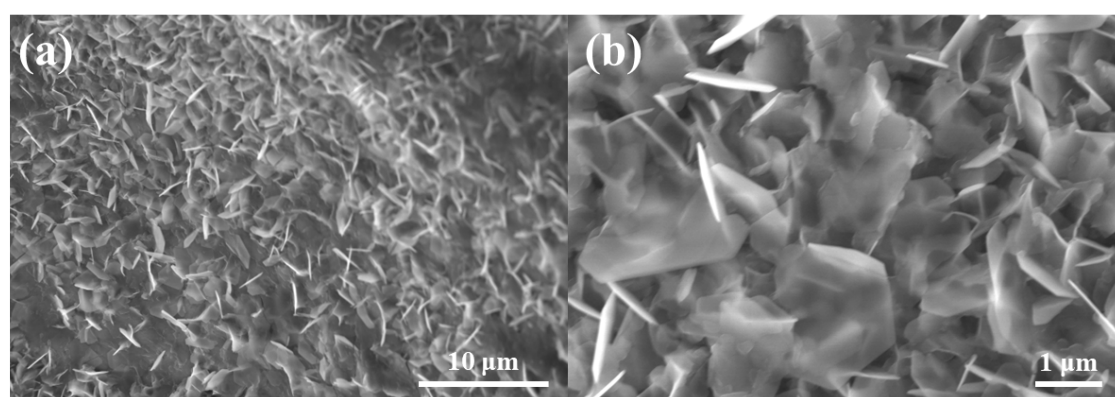

**Fig. S5**(a, b) Top-view SEM images of the Zn@Bare Cu foam after been plated a capacity of 4 mAh cm<sup>-2</sup>.

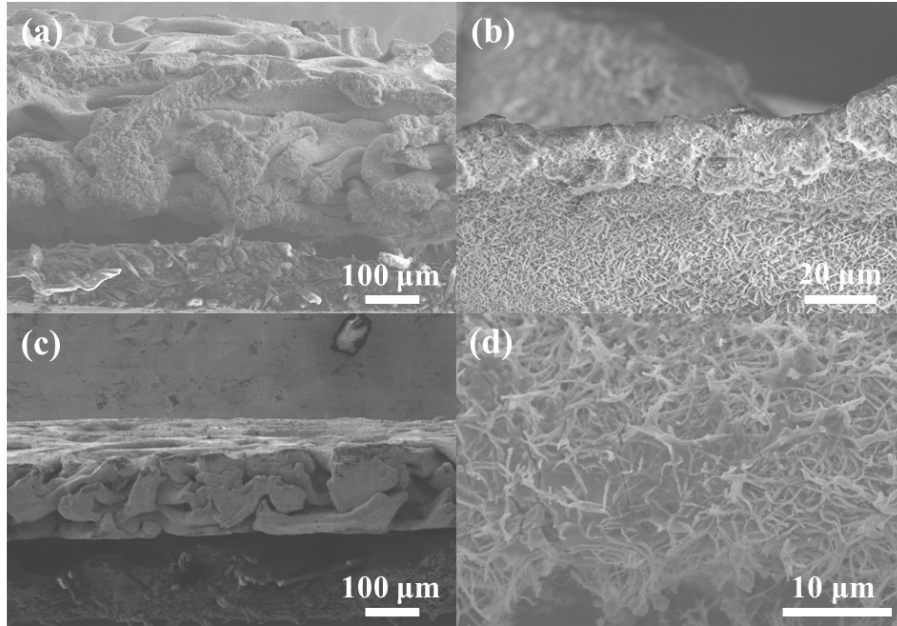

**Fig. S6** SEM images of the side wall of (a, b) Bare Cu foam and (c, d) Cu NW@Cu foam with the areal capacity of 3 mAh cm<sup>-2</sup> after deposition.

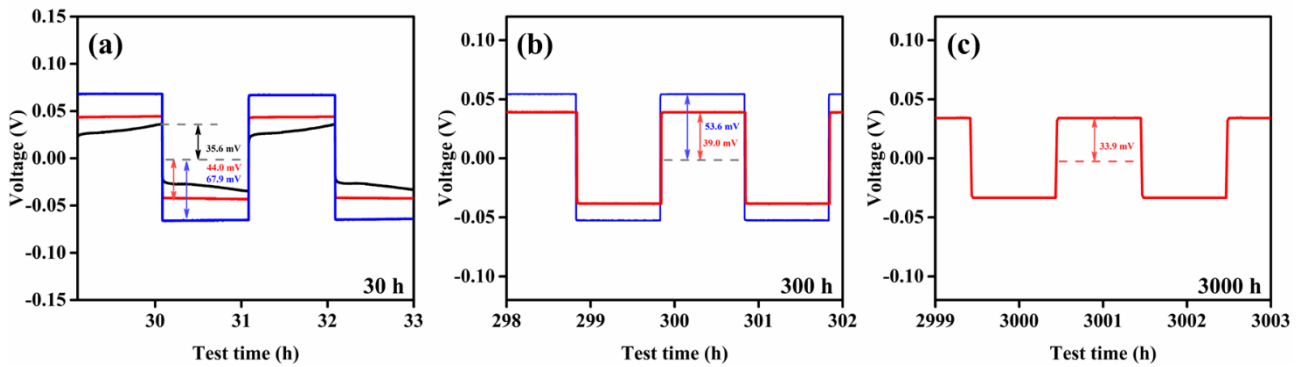

**Fig. S7(a-c)** Enlarged voltage-time curves of Zn@Cu NW@Cu foam at different cycles curves at 1.0 mA cm<sup>-2</sup>.

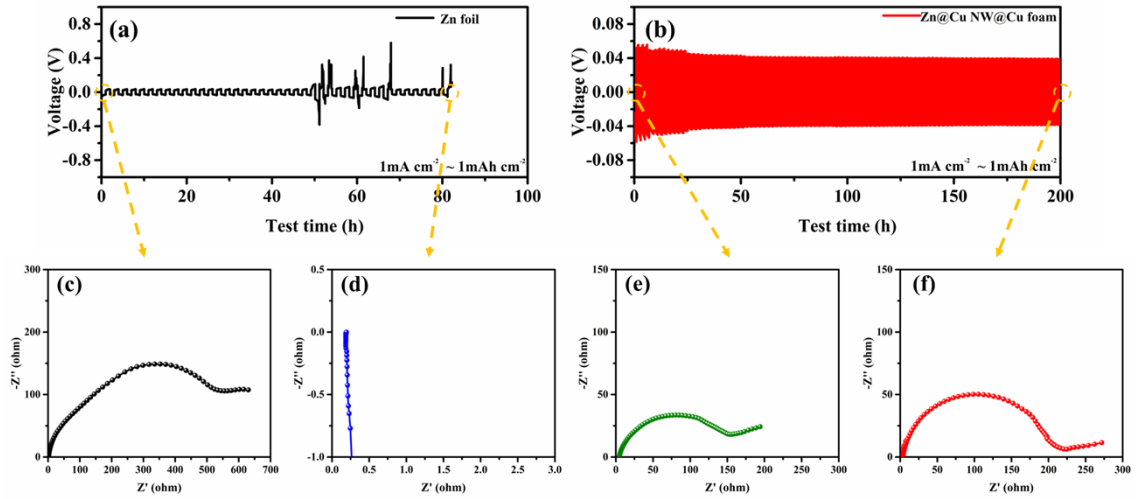

**Fig. S8** Electrochemical performances of symmetric cells for (a) Zn foil and (b) Zn@Cu NW@Cu foam at  $1\text{mA cm}^{-2}$ . The corresponding impedance spectra of the positions in (c) before test for Zn foil, (d) after 80 h before test for Zn foil, (e) before test for Zn@Cu NW@Cu foam, (f) after 200 h before test for Zn@Cu NW@Cu foam.

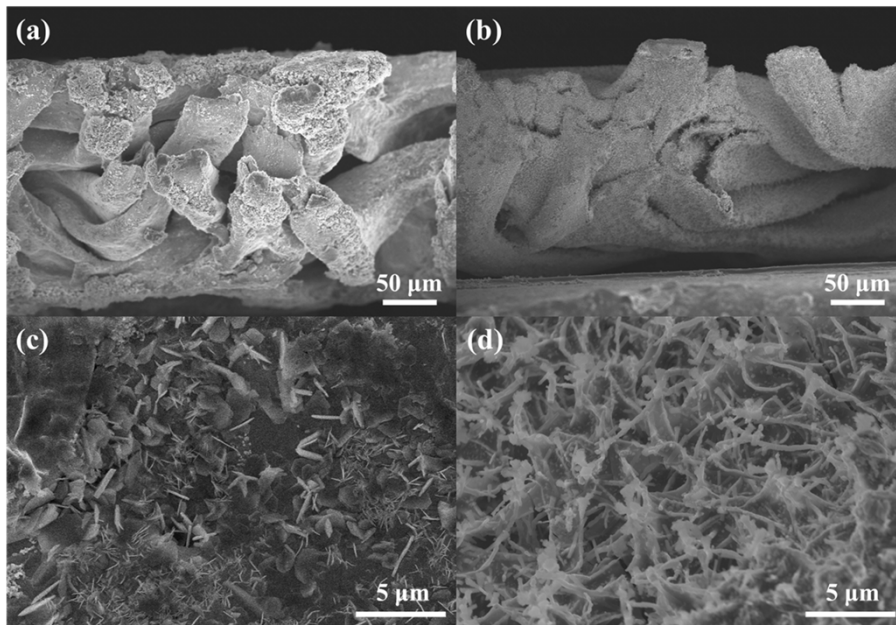

**Fig. S9** Cross-sectional SEM images of (e) Zn@Bare Cu foam and (f) Zn@Cu NW@Cu foam after 50 cycles for the symmetrical cells; and the corresponding top-view SEM images of (c) Zn@ Bare Cu foam and (d) Zn@Cu NW@Cu foam.

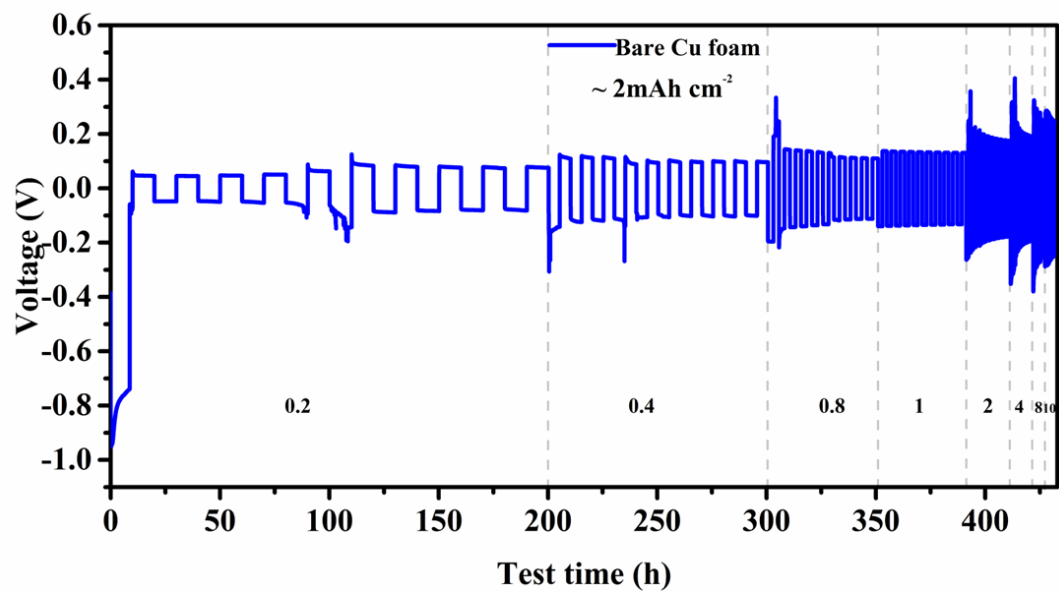

**Fig. S10(a)** the corresponding voltage hysteresis of Bare Cu foam is at different current densities from 0.2 to 10 mA cm<sup>-2</sup>.

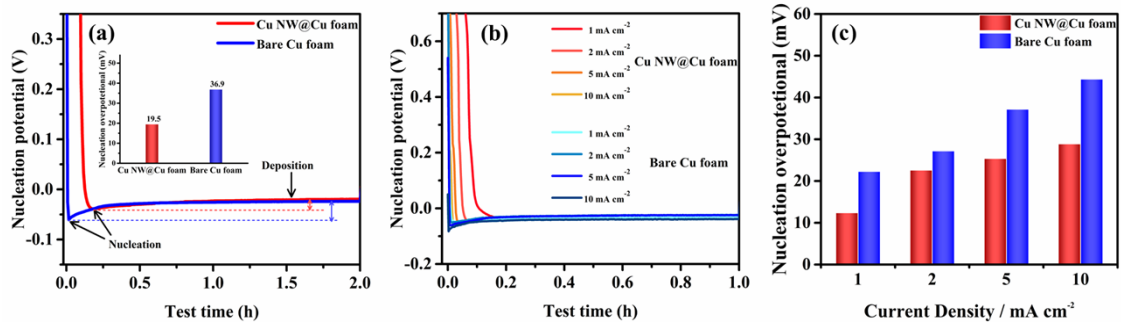

**Fig. S11(a-b)** Potential-time curves of Zn // Cu NW@Cu foam and Zn // Bare Cu foam at different current density, and (c) the nucleation potential values. cm<sup>-2</sup>.

**Table S1** Comparison of the mass loading of zinc deposited on copper substrates at different areal capacities

| Sample        | Deposition capacity<br>(mAh cm <sup>-2</sup> ) | M <sub>(initial)</sub><br>(g cm <sup>-2</sup> ) | M <sub>(final)</sub><br>(g cm <sup>-2</sup> ) | ΔM <sub>(Zn)</sub><br>(g cm <sup>-2</sup> ) |
|---------------|------------------------------------------------|-------------------------------------------------|-----------------------------------------------|---------------------------------------------|
| Bare Cu foam  | 1.0                                            | 0.0574                                          | 0.0621                                        | 0.0047                                      |
| Bare Cu foam  | 2.0                                            | 0.0596                                          | 0.0648                                        | 0.0052                                      |
| Bare Cu foam  | 3.0                                            | 0.0572                                          | 0.0629                                        | 0.0057                                      |
| Bare Cu foam  | 4.0                                            | 0.0575                                          | 0.0658                                        | 0.0083                                      |
| Cu NW@Cu foam | 1.0                                            | 0.0568                                          | 0.0626                                        | 0.0058                                      |
| Cu NW@Cu foam | 2.0                                            | 0.0558                                          | 0.0648                                        | 0.0090                                      |
| Cu NW@Cu foam | 3.0                                            | 0.0614                                          | 0.0730                                        | 0.0116                                      |
| Cu NW@Cu foam | 4.0                                            | 0.0548                                          | 0.0687                                        | 0.0139                                      |

**Table S2** The electrochemical performance of the recently works of Zn anodes by using different kinds of the zincophilic hosts for aqueous ZIBs

| Host                                                | Current density<br>(mA cm <sup>-2</sup> ) | Capacity<br>(mAh cm <sup>-2</sup> ) | Cycling life<br>(h) | Voltage hysteresis<br>(mV) | Ref.  |
|-----------------------------------------------------|-------------------------------------------|-------------------------------------|---------------------|----------------------------|-------|
| carbon fiber-graphite felt<br>graphene              | 1                                         | 1                                   | 700                 | 50                         | [S1]  |
| Ti <sub>3</sub> C <sub>2</sub> T <sub>x</sub> MXene | 1                                         | 1                                   | 300                 | 83                         | [S2]  |
| 3D porous copper skeleton                           | 0.5                                       | 0.5                                 | 350                 | 40                         | [S3]  |
| Cu foam                                             | 2                                         | 1                                   | 150                 | 40                         | [S4]  |
| DCP-Zn                                              | 0.5                                       | 0.1                                 | 1400                | 60                         | [S5]  |
| 3DCu                                                | 0.2                                       | 0.033                               | 35                  | 60                         | [S6]  |
| CNT foam                                            | 3                                         | 0.5                                 | 166.7               | 230                        | [S7]  |
| PBI-Cu                                              | 10                                        | 1                                   | 300                 | 35                         | [S8]  |
| 3D ZnP/CF                                           | 1                                         | 1                                   | 3000                | 25.1                       | [S9]  |
| Zn <sub>88</sub> Al <sub>12</sub>                   | 0.5                                       | 0.5                                 | 2000                | ~20                        | [S10] |
| CM@CuO                                              | 1                                         | 1                                   | 340                 | 20                         | [S11] |
| ZnAl@Cu-mesh                                        | 1                                         | 0.25                                | 180                 | 67                         | [S12] |
| 3D Ti-TiO <sub>2</sub>                              | 1                                         | 1                                   | 2000                | 28                         | [S13] |
| AgNPs@CC                                            | 2                                         | 2                                   | 800                 | 56                         | [S14] |
| N-VG@CC                                             | 0.5                                       | 0.5                                 | 150                 | 6.2                        | [S15] |



|                 |           |          |             |              |             |
|-----------------|-----------|----------|-------------|--------------|-------------|
| MGA             | 10        | 1        | 1050        | 64           | [S16]       |
| MXene@Sb        | 0.5       | 0.5      | 1000        | ~80          | [S17]       |
| PCu             | 10        | 1        | 120         | 40           | [S18]       |
| Cu NBs@NCFs     | 2         | 1        | 450         | 34.6         | [S19]       |
| TZNC            | 1         | 1        | 450         | ~50          | [S20]       |
|                 | <b>1</b>  | <b>1</b> | <b>3000</b> | <b>33.9</b>  |             |
| <b>Cu NW@Cu</b> |           |          |             |              | <b>This</b> |
| <b>foam</b>     | <b>10</b> | <b>2</b> | <b>300</b>  | <b>132.1</b> | <b>work</b> |

- S1. L.-P. Wang, N.-W. Li, T.-S. Wang, Y.-X. Yin, Y.-G. Guo and C.-R. Wang, *Electrochim. Acta*, 2017, **244**, 172.
- S2. Y. Tian, Y. An, C. Wei, B. Xi, S. Xiong, J. Feng and Y. Qian, *ACS nano*, 2019, **13**, 11676.
- S3. Z. Kang, C. Wu, L. Dong, W. Liu, J. Mou, J. Zhang, Z. Chang, B. Jiang, G. Wang, F. Kang and C. Xu, *ACS Sustainable Chem. Eng.*, 2019, **7**, 3364.
- S4. C. Li, X. Shi, S. Liang, X. Ma, M. Han, X. Wu and J. Zhou, *Chem. Eng. J.*, 2020, **379**, 122248.
- S5. W. Guo, Z. Cong, Z. Guo, C. Chang, X. Liang, Y. Liu, W. Hu and X. Pu, *Energy Storage Mater.*, 2020, **30**, 104.
- S6. J. S. Ko, K. Bishop, N. Seitzman, B.-R. Chen, M. F. Toney and J. Nelson Weker, *J. Electrochem. Soc.*, 2020, **167**, 140520.
- S7. Y. Zhou, X. Wang, X. Shen, Y. Shi, C. Zhu, S. Zeng, H. Xu, P. Cao, Y. Wang, J. Di and Q. Li, *J. Mater. Chem. A*, 2020, **8**, 11719.
- S8. Q. Jian, Y. Wan, J. Sun, M. Wu and T. Zhao, *J. Mater. Chem. A*, 2020, **8**, 20175.
- S9. Y. Du, X. Chi, J. Huang, Q. Qiu and Y. Liu, *J. Power Sources*, 2020, **479**, 228808.
- S10. S. B. Wang, Q. Ran, R. Q. Yao, H. Shi, Z. Wen, M. Zhao, X. Y. Lang and Q. Jiang, *Nat. commun.*, 2020, **11**, 1634.
- S11. Q. Zhang, J. Luan, X. Huang, L. Zhu, Y. Tang, X. Ji and H. Wang, *Small*, 2020, **16**, e2000929.
- S12. Z. Qi, T. Xiong, T. Chen, C. Yu, M. Zhang, Y. Yang, Z. Deng, H. Xiao, W. S. V. Lee and J. Xue, *ACS Appl. Mater. Interfaces*, 2021, **13**, 28129.
- S13. Y. An, Y. Tian, S. Xiong, J. Feng and Y. Qian, *ACS nano*, 2021, **7**, 11828.
- S14. T. Chen, Y. Wang, Y. Yang, F. Huang, M. Zhu, B. T. W. Ang and J. M. Xue, *Adv. Funct. Mater.*, 2021, **31**, 2101607.
- S15. Q. Cao, H. Gao, Y. Gao, J. Yang, C. Li, J. Pu, J. Du, J. Yang, D. Cai, Z. Pan, C. Guan and W. Huang, *Adv. Funct. Mater.*, 2021, **31**, 2103922.
- S16. J. Zhou, M. Xie, F. Wu, Y. Mei, Y. Hao, L. Li and R. Chen, *Adv. Mater.*, 2022, **34**, e2106897.
- S17. Y. Tian, Y. An, C. Liu, S. Xiong, J. Feng and Y. Qian, *Energy Storage Mater.*, 2021, **41**, 343-353.
- S18. J. Zhou, F. Wu, Y. Mei, Y. Hao, L. Li, M. Xie and R. Chen, *Adv. Mater.*, 2022, **34**, e2200782.
- S19. Y. Zeng, P. X. Sun, Z. Pei, Q. Jin, X. Zhang, L. Yu and X. W. D. Lou, *Adv. Mater.*, 2022, **34**, e2200342.
- S20. P. X. Sun, Z. Cao, Y. X. Zeng, W. W. Xie, N. W. Li, D. Luan, S. Yang, L. Yu and X. W. D. Lou, *Angew. Chem.*, 2022, **61**, e202115649.

**Table S3** compare the Zn||Cu asymmetric cell performance regarding to the CE, life time, and areal capacity

| Host                         | electrolyte                                                              | current density<br>(mA cm <sup>-2</sup> ) | Areal capacity<br>(mAh cm <sup>-2</sup> ) | Lifespan<br>(h) | Coulombic efficiency<br>(CE) | Ref.                 |
|------------------------------|--------------------------------------------------------------------------|-------------------------------------------|-------------------------------------------|-----------------|------------------------------|----------------------|
| 3DP-FeNi                     | 3 M ZnSO <sub>4</sub>                                                    | 1                                         | 1                                         | 200             | 98.8%                        | [R1]                 |
| Cu NBs@NCFs                  | 2 M ZnSO <sub>4</sub>                                                    | 5                                         | 1                                         | 1000            | 98.8%                        | [R2]                 |
| CuZIF-L@TM                   | 2 M ZnSO <sub>4</sub>                                                    | 1                                         | 1                                         | 300             | 97.6%                        | [R3]                 |
| TZNC                         | 2 M ZnSO <sub>4</sub>                                                    | 5                                         | 1                                         | 1000            | 98.6%                        | [R4]                 |
| CnC HS                       | 3 M<br>Zn(CF <sub>3</sub> SO <sub>3</sub> ) <sub>2</sub>                 | 4                                         | 1                                         | 200             | 95%                          | [R5]                 |
| MXene@Sb-300                 | 3 M<br>Zn(CF <sub>3</sub> SO <sub>3</sub> ) <sub>2</sub>                 | 1                                         | 0.1                                       | 1500            | 97.2%                        | [R6]                 |
| N-VG@CC                      | 2 M ZnSO <sub>4</sub>                                                    | 5                                         | 2                                         | 10              | 95%                          | [R7]                 |
| 3D Ti-TiO <sub>2</sub>       | 3 M ZnSO <sub>4</sub>                                                    | 5                                         | 2                                         | 120             | 95.01%                       | [R8]                 |
| PBI-Cu                       | 1 M ZnSO <sub>4</sub>                                                    | 2                                         | 1                                         | 200             |                              | [R9]                 |
| DCP                          | 2 M<br>Zn(CF <sub>3</sub> SO <sub>3</sub> ) <sub>2</sub>                 | 2                                         | 1                                         | 50              | 97%                          | [R10]                |
| ED Zn                        | 1 M ZnSO <sub>4</sub>                                                    | 1                                         | 1                                         | 100             | 98%                          | [R11]                |
| CNT                          | 2 M ZnSO <sub>4</sub>                                                    | 2                                         | 2                                         | 30              | 95%-97%                      | [R12]                |
| 3D Porous<br>Copper Skeleton | 2 M ZnSO <sub>4</sub>                                                    | 1                                         | 2                                         | 66              | 99.53%                       | [R13]                |
| GF                           | 0.5 M Na <sub>2</sub> SO <sub>4</sub><br>and 0.05 M<br>ZnSO <sub>4</sub> | 1                                         | 1                                         | 150             | 96.5%                        | [R14]                |
| PCu                          |                                                                          | 5                                         | 1                                         | 450             | 97.55%                       | [R15]                |
| <b>Cu NW@Cu<br/>foam</b>     | <b>2 M ZnSO<sub>4</sub></b>                                              | <b>1</b>                                  | <b>2</b>                                  | <b>150</b>      | <b>98%</b>                   | <b>This<br/>work</b> |

- R1. Y. Xiong, F. Zhou, D. Zhu, X. Jing, H. Shi, W. Li and D. Wang, *Journal of The Electrochemical Society*, 2023, **170**, 010516.
- R2. Y. Zeng, P. X. Sun, Z. Pei, Q. Jin, X. Zhang, L. Yu and X. W. David Lou, *Advanced materials*, 2022, **34**, 2200342.
- R3. Y. Tao, S. W. Zuo, S. H. Xiao, P. X. Sun, N. W. Li, J. S. Chen, H. B. Zhang and L. Yu, *Small*, 2022, **18**, e2203231.
- R4. P. X. Sun, Z. Cao, Y. X. Zeng, W. W. Xie, N. W. Li, D. Luan, S. Yang, L. Yu and X. W. D. Lou, *Angewandte Chemie*, 2022, **61**, e202115649.
- R5. F. Xie, H. Li, X. Wang, X. Zhi, D. Chao, K. Davey and S. Z. Qiao, *Advanced Energy Materials*, 2021, **11**, 2003419.

- R6. Y. Tian, Y. An, C. Liu, S. Xiong, J. Feng and Y. Qian, *Energy Storage Materials*, 2021, **41**, 343.
- R7. Q. Cao, H. Gao, Y. Gao, J. Yang, C. Li, J. Pu, J. Du, J. Yang, D. Cai, Z. Pan, C. Guan and W. Huang, *Advanced Functional Materials*, 2021, **31**, 2103922.
- R8. Y. An, Y. Tian, S. Xiong, J. Feng and Y. Qian, *ACS Nano* 2021 **15**, 11828.
- R9. Q. Jian, Y. Wan, J. Sun, M. Wu and T. Zhao, *Journal of Materials Chemistry A*, 2020, **8**, 20175.
- R10. W. Guo, Z. Cong, Z. Guo, C. Chang, X. Liang, Y. Liu, W. Hu and X. Pu, *Energy Storage Materials*, 2020, **30**, 104.
- R11. M. Fayette, H. J. Chang, I. A. Rodri Guez-Perez, X. Li and D. Reed, *ACS Appl Mater Interfaces*, 2020, **12**, 42763.
- R12. Y. Zeng, X. Zhang, R. Qin, X. Liu, P. Fang, D. Zheng, Y. Tong and X. Lu, *Advanced materials*, 2019, **31**, e1903675.
- R13. Z. Kang, C. Wu, L. Dong, W. Liu, J. Mou, J. Zhang, Z. Chang, B. Jiang, G. Wang, F. Kang and C. Xu, *ACS Sustainable Chemistry & Engineering*, 2019, **7**, 3364.
- R14. L.-P. Wang, N.-W. Li, T.-S. Wang, Y.-X. Yin, Y.-G. Guo and C.-R. Wang, *Electrochimica Acta*, 2017, **244**, 172.
- R15. J. Zhou, F. Wu, Y. Mei, Y. Hao, L. Li, M. Xie and R. Chen, *Advanced materials*, 2022, **34**, e2200782.

**Table S4** the electrochemical performance of the recently works of Zn anodes regarding to the areal capacity

| Cathode                                   | Anode                   | Areal capacity<br>(mAh cm <sup>-2</sup> ) | Cycling capacity<br>(mAh g <sup>-1</sup> )                                                             | Ref.         |
|-------------------------------------------|-------------------------|-------------------------------------------|--------------------------------------------------------------------------------------------------------|--------------|
| $\alpha$ -MnO <sub>2</sub>                | 3D Zn@CFs               | 7.85                                      | 239.4<br>(140 cycles /1C=308 mAh g <sup>-1</sup> )                                                     | [M1]         |
| $\alpha$ -MnO <sub>2</sub>                | Zn@CP                   | 8.33                                      | 150<br>(150 cycles /0.75 A g <sup>-1</sup> )                                                           | [M2]         |
| LiMn <sub>2</sub> O <sub>4</sub><br>(LMO) | MGA@Zn                  | 5.0                                       | 60<br>(480 cycles /2C=296 mAh g <sup>-1</sup> )                                                        | [M3]         |
| NVO                                       | Zn@Cu-<br>Sn@SSM        | 5.0                                       | 162<br>(1000 cycles /2.0 A g <sup>-1</sup> )                                                           | [M4]         |
| MnO <sub>2</sub>                          | C <sub>flower</sub> /Zn | 1.0                                       | (275 mA h g <sup>-1</sup> at 0.1 A g <sup>-1</sup><br>75 mA h g <sup>-1</sup> at 5 A g <sup>-1</sup> ) | [M5]         |
| $\alpha$ -MnO <sub>2</sub>                | Zn@Cu<br>NW@Cu foam     | 4.0                                       | 181.8<br>(3000 cycles /2.0 A g <sup>-1</sup> )                                                         | This<br>work |

- M1. W. Dong, J.-L. Shi, T.-S. Wang, Y.-X. Yin, C.-R. Wang and Y.-G. Guo, *RSC Advances*, 2018, **8**, 19157.
- M2. Z. Wu, X. Yuan, M. Jiang, L. Wang, Q. Huang, L. Fu and Y. Wu, *Energy & Fuels*, 2020, **34**, 13118.

M3. J. Zhou, M. Xie, F. Wu, Y. Mei, Y. Hao, L. Li and R. Chen, *Advanced materials*, 2022, **34**, e2106897.

M4. Q. Zhao, W. Liu, Y. Chen and L. Chen, *Chemical Engineering Journal*, 2022, **450**, 137979.

M5. Z. Xu, S. Jin, N. Zhang, W. Deng, M. H. Seo and X. Wang, *Nano letters*, 2022, **22**, 1350.

**Table S5** Impedance parameters calculated from an equivalent circuit model

| <b>Sample</b>                                | <b>R<sub>s</sub></b> | <b>R<sub>f</sub></b> | <b>R<sub>ct</sub></b> |
|----------------------------------------------|----------------------|----------------------|-----------------------|
| Zn@Cu NW@Cu foam // MnO <sub>2</sub> -fresh  | 2.1                  | 22.1                 | 38.5                  |
| Zn@Cu NW@Cu foam // MnO <sub>2</sub> -after  | 5.7                  | 33.3                 | 99.2                  |
| 20 cycles                                    |                      |                      |                       |
| Zn foil // MnO <sub>2</sub> -fresh           | 2.9                  | 66.6                 | 68.2                  |
| Zn foil // MnO <sub>2</sub> -after 20 cycles | 4.0                  | 115.7                | 125.7                 |
